# Supplementary material for: Collective interaction effects associated with mammalian behavioral traits reveal genetic factors connecting fear and hemostasis
Source: Springer Nature journal article supplement (doi:10.1186/s12888-018-1753-4), 2018-06-05
Supplement: MOESM1 [file 15821592]

Collective interaction effects associated with mammalian behavioral  
traits reveal genetic factors connecting fear and hemostasis:  
Supplementary Information

H. J. Woo & J. Reifman

Table S1: Sample sizes of behavioral trait data considered for outbred mice<sup>8</sup> and dogs<sup>5</sup>. Variables refer to names in the original reports. Fractional quantities were log-transformed before use with small constants added to avoid singular values. Covariates are variables used to stratify the cohort into two sub-groups for meta-analysis. EPM, elevated plus maze; FC, fear conditioning; PC, principal component; PPI, prepulse inhibition.

|             |                         | Variable                     | Covariate                | <i>n</i> |
|-------------|-------------------------|------------------------------|--------------------------|----------|
| FC          | Cue                     | FC.Cue.MeanFreeze.Corrected  | Sex                      | 1,716    |
|             | Context                 | FC.Context.Freeze.Corrected  | Sex                      | 1,667    |
| PPI         |                         | SPPI.pc_average_ABC          | Sex                      | 1,572    |
| EPM         |                         | Open = EPM.OpenArms.Time     |                          |          |
|             |                         | Closed = EPM.ClosedArms.time |                          |          |
|             |                         | Closed/ (Open + Closed)      | Sex                      | 1,592    |
| Forced swim |                         | PST.Immobility.Last4min      | PST.Immobility.First2min | 1,659    |
| Sleep       | Duration                | Sleep.s24h                   | Sex                      | 1,448    |
|             | Difference (light/dark) | Sleep.sDif_LD                | Weight.Average           | 1,065    |
| Fear (dogs) | Noise                   | NoiseFear                    | PC1                      | 868      |
|             | Human/object            | HOFear                       | PC1                      | 882      |

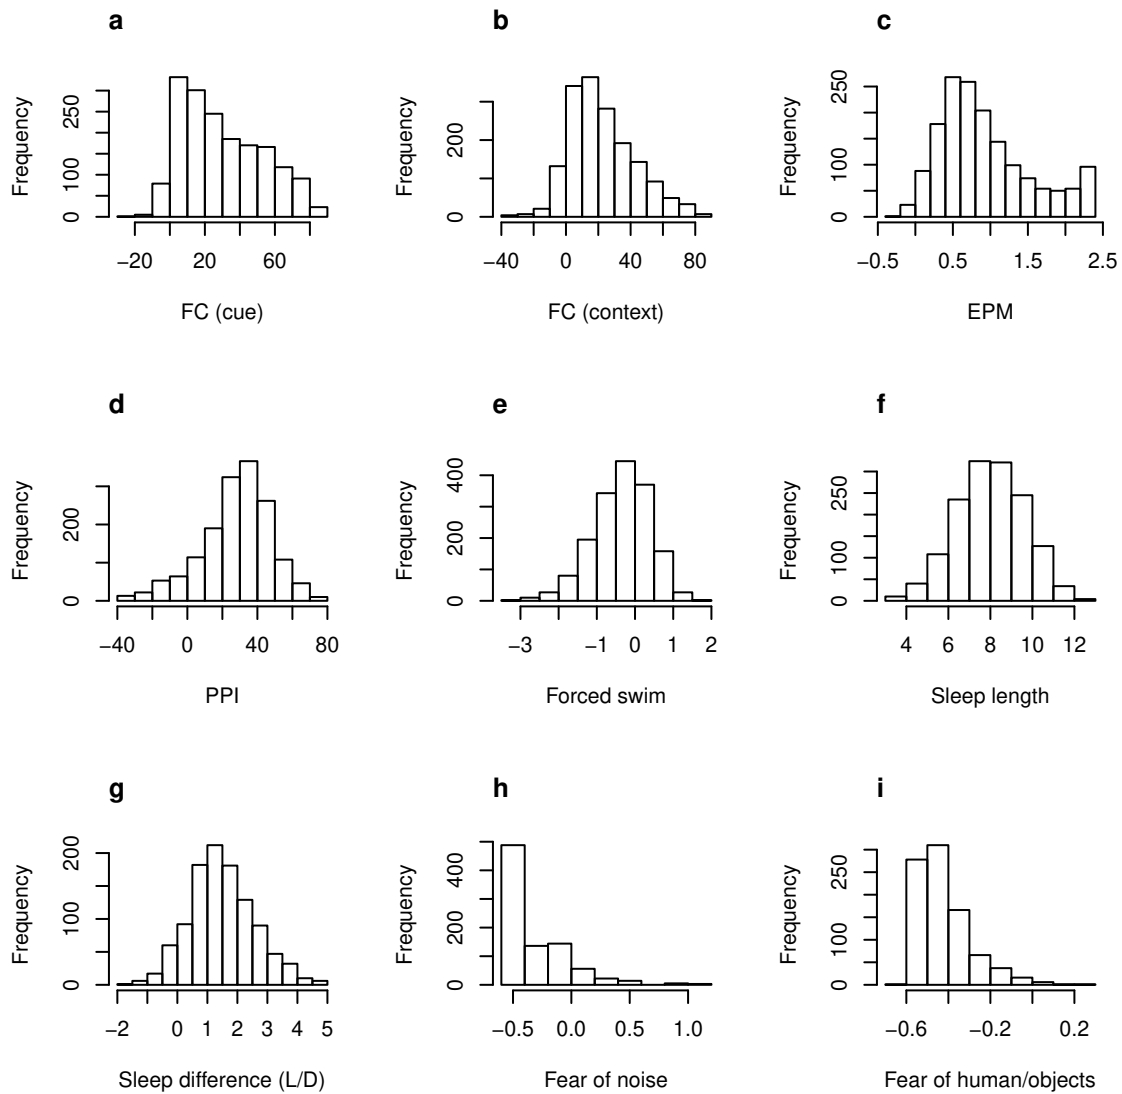

Figure S1: Distributions of quantitative trait values used for association testing. See Table S1. **c**, **e**, **h**, and **i** have been log-transformed (**c** and **e** from percentages, and **h** and **i** from a scale of 1 to 5).

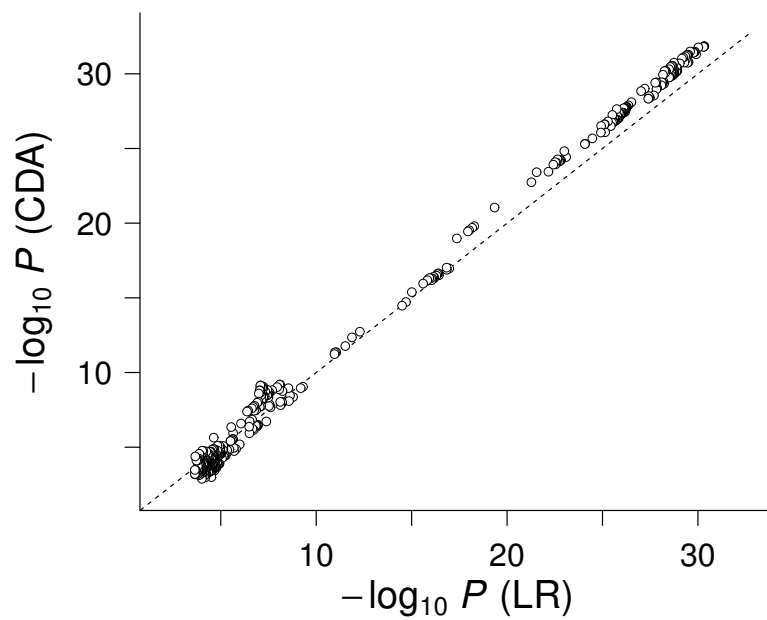

Figure S2: Comparison of single-SNP  $p$ -values from linear regression (LR) and continuous discriminant analysis (CDA). The genotype-phenotype combination of mouse data for bone mineral content (“BMC.mean”) was used to obtain LR  $p$ -values for all SNPs. SNPs with LR  $P < 1 \times 10^{-3}$  were then selected (622 in total) and CDA inference was performed for each SNP separately ( $m = 1$ ) under 5-fold cross-validation. The prediction scores  $R$  were then transformed into  $p$ -values using the  $t$ -distribution as the null distribution. The dotted line is the diagonal.

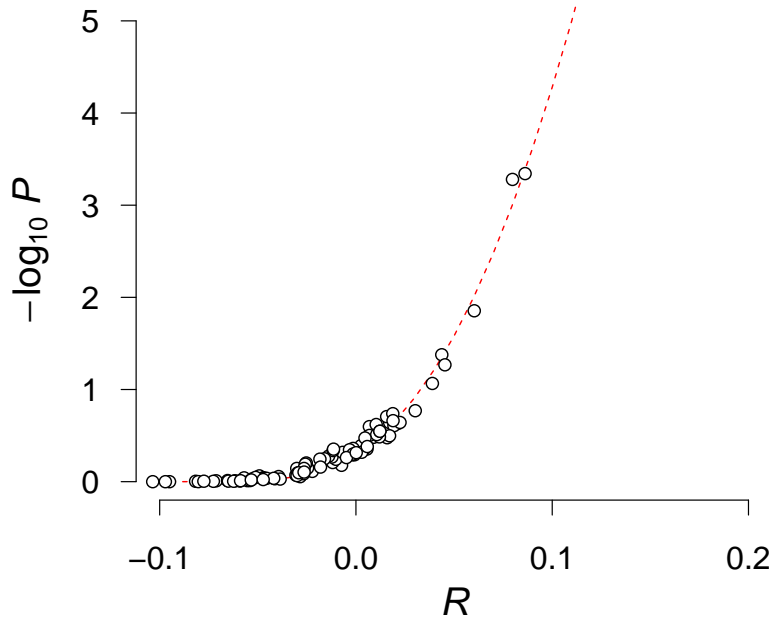

Figure S3: Comparison of empirical  $p$ -values of groups of interacting SNPs estimated by permutation of phenotype labels (symbols) and the use of the null distribution of  $R$  for normally distributed data. The latter was obtained from  $t > R\sqrt{(n-2)/(1-R^2)}$  in the  $t$ -distribution with d.f. =  $n - 2$ , which was indistinguishable from  $P = 1 - \Phi(z)$  where  $\Phi$  is the c.d.f. of the standard normal distribution and  $z = (1/2)\sqrt{n-3} \ln[(1+R)/(1-R)]$ .  $n = 1,716$  is the sample size. The SNP groups for genes were formed by selecting variants (CFW mice) within 50 kb of the coding regions. Continuous discriminant analysis inference was first performed for the association with fear conditioning (cued test) traits for each SNP group under the alternative hypothesis. The inference was then repeated under the null hypothesis with phenotype-label permutation for  $\sim 1,000$  replicates. The  $p$ -value was estimated as the fraction of times the null  $R$  was higher than the alternative  $R$ .

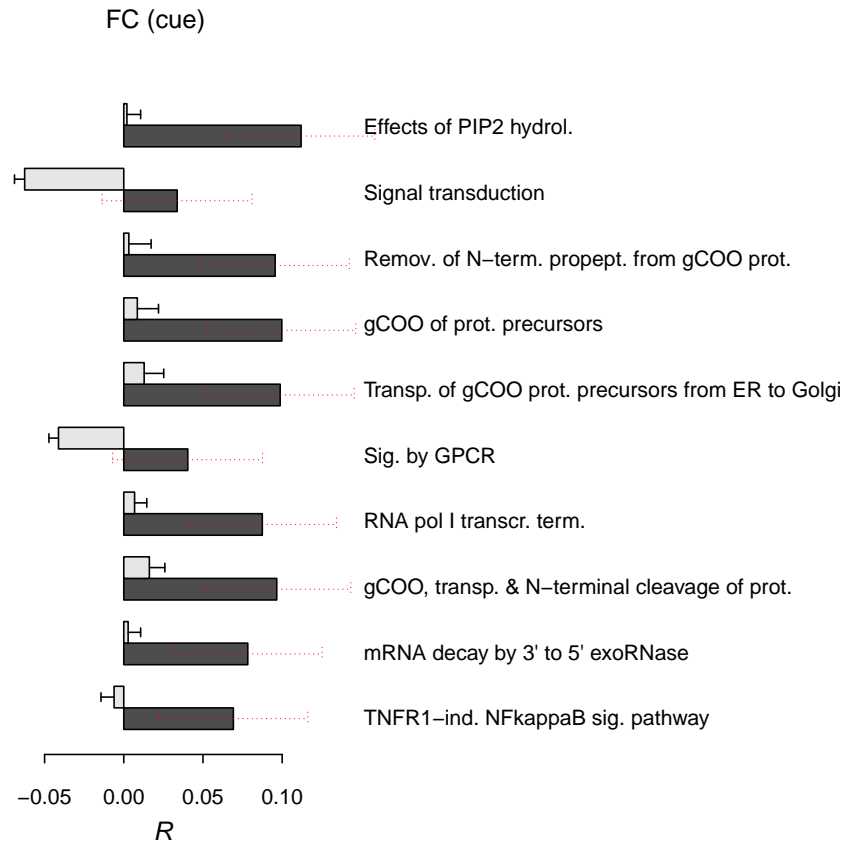

Figure S4: Optimized prediction scores of 10 top-ranked pathways for fear conditioning (FC; cued test). Bars in dark and light colors represent the values of  $R$  (alternative hypothesis) and the mean of  $R_0$  (null hypothesis sampled with phenotype-label permutation). The error bars on  $R$  and  $R_0$  represent the 95% c.i. and the standard error of means ( $n = 10$ ), respectively. ER, endoplasmic reticulum; gCOO,  $\gamma$ -carboxylation; GPCR, G protein-coupled receptor; hydrol., hydrolysis; ind., induced; PIP2, phosphatidylinositol phosphate 2; pol I, polymerase I; propept., propeptide; prot., protein; remov., removal; sig., signaling; term., termination; transcr., transcription; transp., transport.

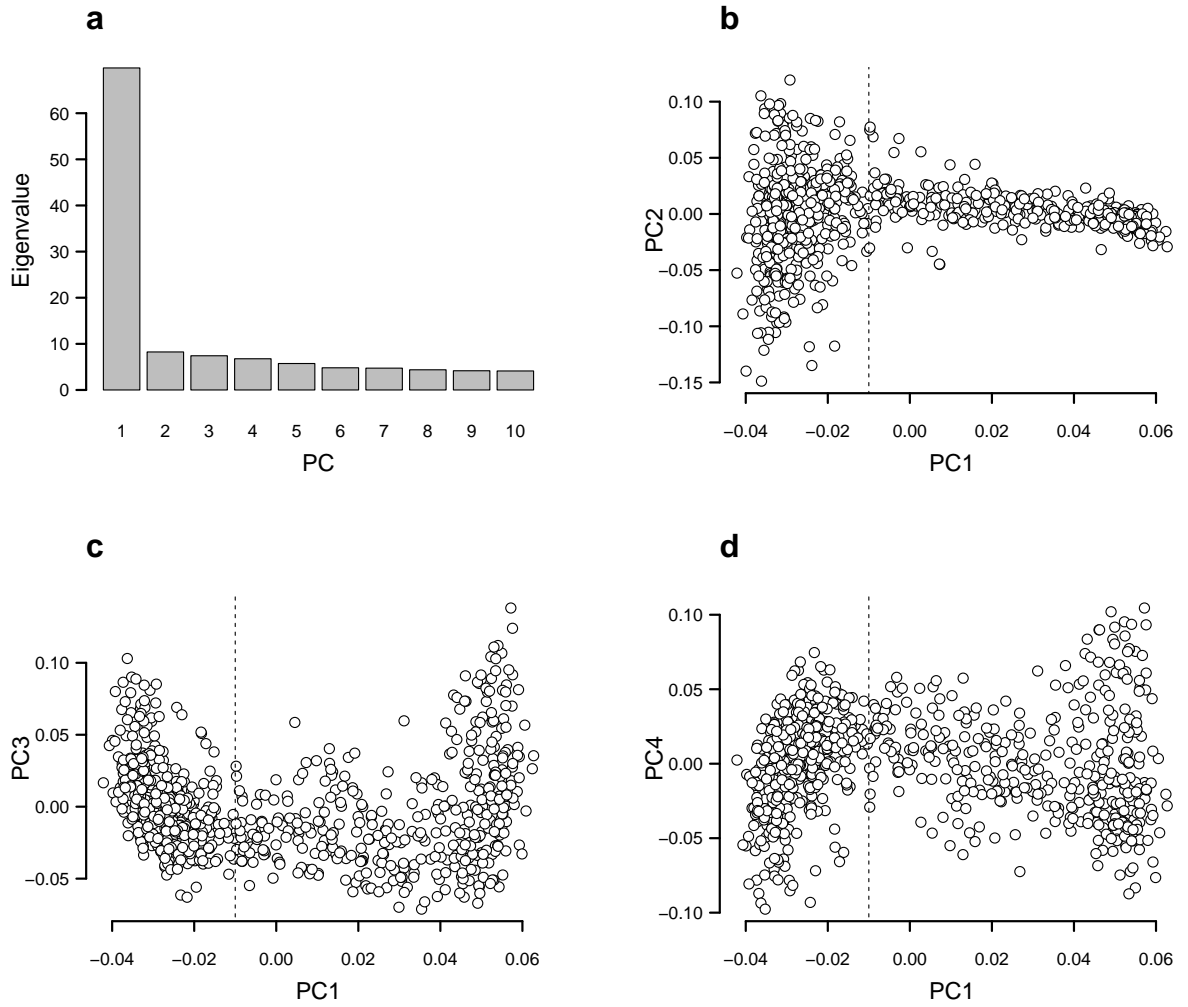

Figure S5: Population stratification of Labrador Retrievers using principal component (PC) analysis. Results for the human/object-oriented fear trait are shown ( $n = 882$ ). (a) Top ten PC eigenvalues. (b-d) Scatterplots of PC1 versus PC2-4. The vertical dotted lines represent the cutoff we used for PC1 ( $-0.01$ ).

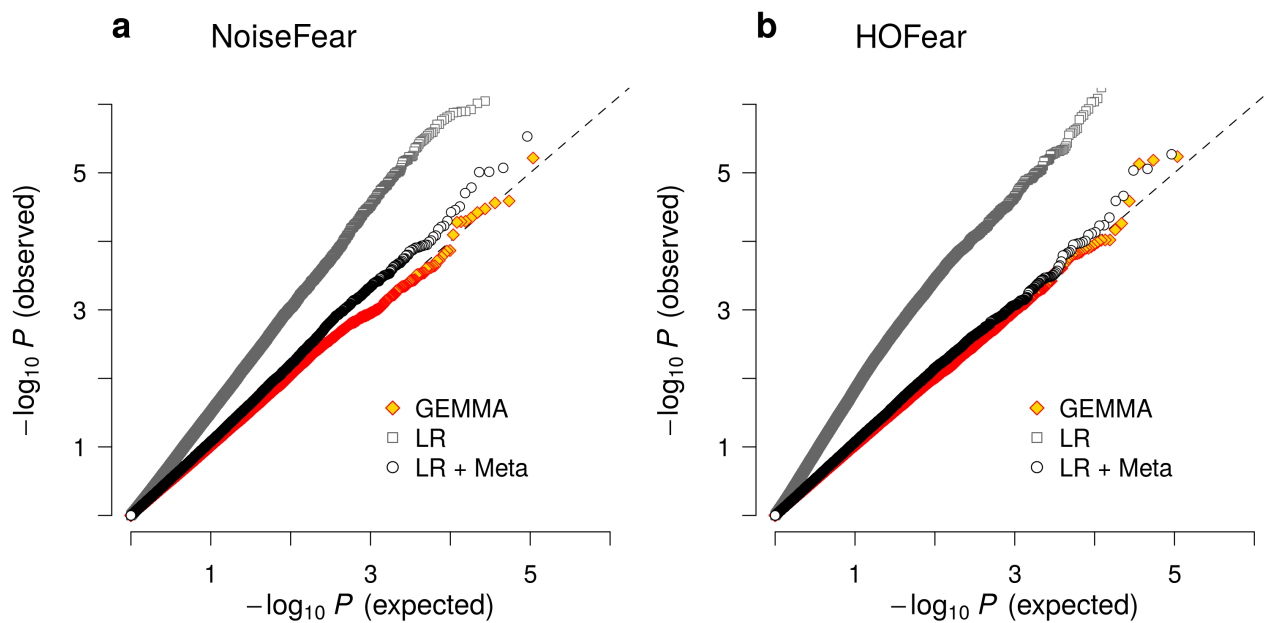

Figure S6: Quantile-quantile plots of independent SNP  $p$ -values for Labrador Retriever data. (a) Fear of noise association. (b) Human/object fear association. Results from linear regression applied to the whole cohort (“LR”) and from meta-analysis (“LR+Meta”) with two sub-groups stratified by the first principal component (see Fig. S5) are compared with those from GEMMA<sup>48</sup>.



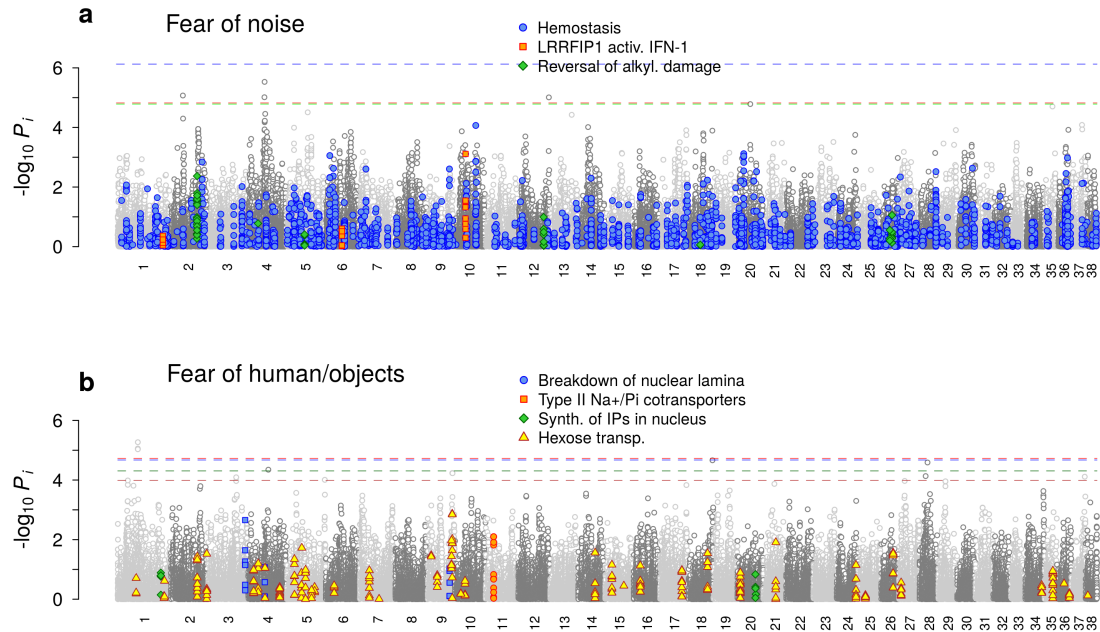

Figure S7: Independent-SNP and collective association of SNPs in pathways highly ranked for fear in dogs. (a) Fear of noise and three top-ranked pathways: *Hemostasis*, *LRRFIP1 activates type I interferon production*, and *Reversal of alkylation damage by DNA dioxygenases*. (b) Fear of humans/objects and four top-ranked pathways: *Breakdown of nuclear lamina*, *Type II Na<sup>+</sup>/Pi cotransporters*, *Synthesis of inositol phosphates in nucleus*, and *Hexose transport*. The dotted horizontal lines represent the collective inference  $p$ -values of the pathways. Activ., activates; alkyl., alkylation; IFN, interferon; IP, inositol phosphate; LRRFIP1, leucine-rich repeat flightless-interacting protein 1; Pi, phosphate; synth., synthesis; transp., transport.

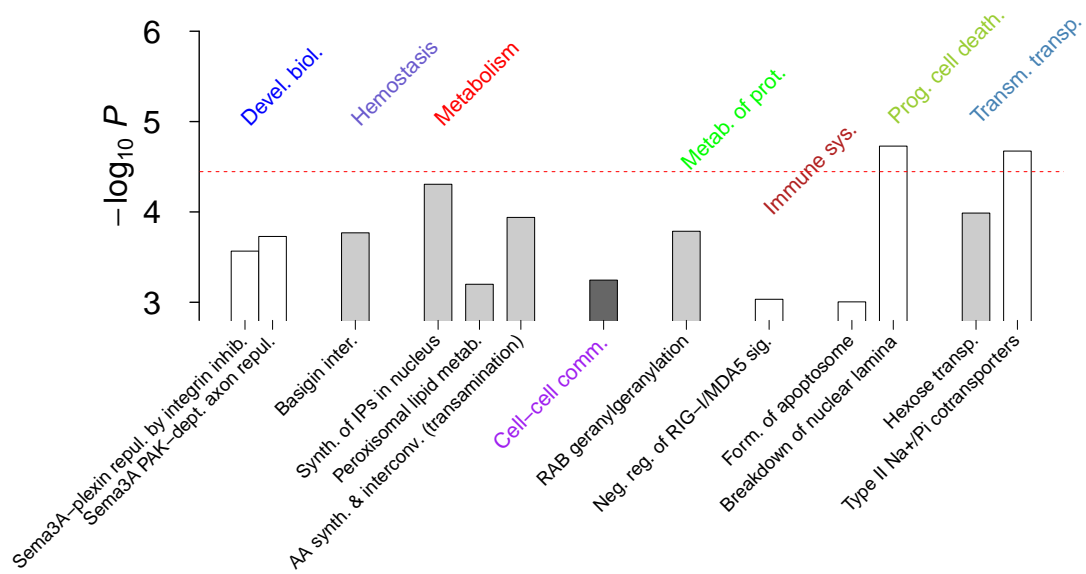

Figure S8: Top-ranked pathways for fear of humans/objects (dogs). See Fig. 5f for the quantile-quantile plot. The dotted line represents the Bonferroni-corrected threshold. AA, amino acid; comm., communication; dept., dependent; devel. biol., developmental biology; form., formation; inhib., inhibition; inter., interaction; interconv., interconversion; IP, inositol phosphate; MDA5, melanoma differentiation-associated protein 5; metab., metabolism; neg., negative; PAK, p21 activated enzyme; Pi, phosphate; prog., programmed; reg., regulation; repul., repulsion; RIG-I, retinoic acid-inducible gene I; Sema, semaphorin; sig., signaling; synth., synthesis; sys., system; transp., transport.

Table S2: Additional pathways from Reactome database (Feb. 2018) ranked by association strengths with respect to fear conditioning (cued test). Pathways with  $P \leq 0.05$  among those not in the main database (Fig. 5) are shown. CREB, cyclic AMP response element-binding protein; IL, interleukin; RUNX, Runt-related transcription factor; SDK, Sidekick; sig., signaling; transcr., transcription.

| Pathway                                               | No. of SNPs | $R$   | $R_0$   | $P$                  |
|-------------------------------------------------------|-------------|-------|---------|----------------------|
| IL-33 sig.                                            | 24          | 0.037 | -0.0246 | $3.8 \times 10^{-3}$ |
| CREB3 factors activate genes                          | 73          | 0.063 | 0.0022  | $4.2 \times 10^{-3}$ |
| RUNX1 regulates transcr. of genes involved in IL sig. | 35          | 0.058 | 0.0021  | $7.6 \times 10^{-3}$ |
| SDK interactions                                      | 13          | 0.041 | -0.0026 | $2.9 \times 10^{-2}$ |
| IL-21 sig.                                            | 172         | 0.037 | -0.0007 | $5.0 \times 10^{-2}$ |
